# Supplementary material
Source: PubMed Central journal article supplement (PMC8274462)
Supplement: zsaa224_suppl_supplementary_material.pdf [file zsaa224_suppl_supplementary_material.pdf]

**Residual, differential neurobehavioral deficits linger after multiple recovery nights  
following chronic sleep restriction or acute total sleep deprivation**

Erika M. Yamazaki, Caroline A. Antler, Charlotte R. Lasek, Namni Goel\*

Biological Rhythms Research Laboratory, Department of Psychiatry and Behavioral Sciences,

Rush University Medical Center, Chicago, IL 60612 USA

\*Corresponding author: Namni Goel, PhD; Biological Rhythms Research Laboratory,  
Department of Psychiatry and Behavioral Sciences, Rush University Medical Center, 1645 W.  
Jackson Blvd., Suite 425, Chicago, IL 60612 USA; Phone: 312-563-4726; Fax: 312-563-4900;  
e-mail: [namni\\_goel@rush.edu](mailto:namni_goel@rush.edu)

**Table S1.** Bonferroni-adjusted pairwise comparisons for both conditions combined for measures without a significant time by condition interaction.

| Measure             | Time Points in Analysis | Study Day  | Study Day   | Mean Difference | SE    | <i>p</i> | CI Lower-bound | CI Upper-bound |
|---------------------|-------------------------|------------|-------------|-----------------|-------|----------|----------------|----------------|
| 10 min PVT Lapses   | All                     | B2         | Sleep Loss* | -7.56           | 0.79  | 0.000    | -9.94          | -5.18          |
|                     |                         |            | R1*         | -0.61           | 0.16  | 0.003    | -1.08          | -0.14          |
|                     |                         |            | R2*         | -0.82           | 0.21  | 0.003    | -1.46          | -0.19          |
|                     |                         |            | R3*         | -0.73           | 0.16  | 0.000    | -1.22          | -0.23          |
|                     |                         |            | R4*         | -1.08           | 0.31  | 0.011    | -2.01          | -0.15          |
|                     |                         | Sleep Loss | R1*         | 6.95            | 0.73  | 0.000    | 4.74           | 9.16           |
|                     |                         |            | R2*         | 6.74            | 0.72  | 0.000    | 4.57           | 8.89           |
|                     |                         |            | R3*         | 6.83            | 0.70  | 0.000    | 4.71           | 8.96           |
|                     |                         |            | R4*         | 6.48            | 0.67  | 0.000    | 4.46           | 8.50           |
|                     |                         | R1         | R2          | -0.22           | 0.15  | 1.000    | -0.67          | 0.24           |
|                     |                         |            | R3          | -0.12           | 0.14  | 1.000    | -0.54          | 0.31           |
|                     |                         |            | R4          | -0.47           | 0.27  | 1.000    | -1.28          | 0.35           |
|                     |                         | R2         | R3          | 0.10            | 0.14  | 1.000    | -0.32          | 0.52           |
|                     |                         |            | R4          | -0.25           | 0.23  | 1.000    | -0.94          | 0.43           |
|                     |                         | R3         | R4          | -0.35           | 0.23  | 1.000    | -1.06          | 0.36           |
|                     |                         | Recovery   | R1          | R2              | -0.22 | 0.15     | 0.928          | -0.62          |
|                     | R3                      |            |             | -0.12           | 0.14  | 1.000    | -0.50          | 0.26           |
|                     | R4                      |            |             | -0.47           | 0.27  | 0.520    | -1.20          | 0.26           |
|                     | R2                      |            | R3          | 0.10            | 0.14  | 1.000    | -0.28          | 0.48           |
|                     |                         |            | R4          | -0.25           | 0.23  | 1.000    | -0.87          | 0.36           |
|                     | R3                      |            | R4          | -0.35           | 0.23  | 0.827    | -0.98          | 0.28           |
| 10 min PVT 1/RT     | Recovery                | R1         | R2          | 0.01            | 0.02  | 1.000    | -0.04          | 0.06           |
|                     |                         |            | R3          | 0.02            | 0.02  | 1.000    | -0.04          | 0.07           |
|                     |                         |            | R4          | 0.06            | 0.03  | 0.153    | -0.01          | 0.13           |
|                     |                         | R2         | R3          | 0.01            | 0.02  | 1.000    | -0.03          | 0.05           |
|                     |                         |            | R4          | 0.05            | 0.02  | 0.074    | 0.00           | 0.11           |
|                     |                         | R3         | R4*         | 0.04            | 0.01  | 0.016    | 0.01           | 0.08           |
| DSST Number Correct | Recovery                | R1         | R2*         | -1.33           | 0.32  | 0.001    | -2.20          | -0.46          |
|                     |                         |            | R3*         | -1.66           | 0.40  | 0.000    | -2.72          | -0.59          |
|                     |                         |            | R4*         | -1.87           | 0.44  | 0.000    | -3.07          | -0.67          |
|                     |                         | R2         | R3          | -0.33           | 0.27  | 1.000    | -1.06          | 0.41           |
|                     |                         |            | R4          | -0.54           | 0.32  | 0.553    | -1.40          | 0.32           |
|                     |                         | R3         | R4          | -0.22           | 0.38  | 1.000    | -1.24          | 0.81           |
| KSS Score           | Recovery                | R1         | R2          | -0.04           | 0.12  | 1.000    | -0.37          | 0.28           |
|                     |                         |            | R3          | -0.08           | 0.13  | 1.000    | -0.42          | 0.27           |
|                     |                         |            | R4          | 0.07            | 0.12  | 1.000    | -0.26          | 0.41           |
|                     |                         | R2         | R3          | -0.03           | 0.07  | 1.000    | -0.23          | 0.17           |
|                     |                         |            | R4          | 0.12            | 0.09  | 1.000    | -0.12          | 0.36           |

|                           |                 |                   |             |       |       |       |       |       |
|---------------------------|-----------------|-------------------|-------------|-------|-------|-------|-------|-------|
|                           |                 | <b>R3</b>         | R4          | 0.15  | 0.07  | 0.252 | -0.05 | 0.35  |
| <b>POMS Fatigue Score</b> | <b>All</b>      | <b>B2</b>         | Sleep Loss* | -4.83 | 0.51  | 0.000 | -6.38 | -3.28 |
|                           |                 |                   | R1          | -0.56 | 0.19  | 0.063 | -1.13 | 0.02  |
|                           |                 |                   | R2          | -0.47 | 0.22  | 0.464 | -1.12 | 0.18  |
|                           |                 |                   | R3          | -0.53 | 0.21  | 0.220 | -1.17 | 0.11  |
|                           |                 |                   | R4          | -0.23 | 0.21  | 1.000 | -0.85 | 0.40  |
|                           |                 | <b>Sleep Loss</b> | R1*         | 4.27  | 0.50  | 0.000 | 2.76  | 5.79  |
|                           |                 |                   | R2*         | 4.35  | 0.53  | 0.000 | 2.74  | 5.97  |
|                           |                 |                   | R3*         | 4.30  | 0.54  | 0.000 | 2.65  | 5.95  |
|                           |                 |                   | R4*         | 4.60  | 0.55  | 0.000 | 2.94  | 6.26  |
|                           |                 | <b>R1</b>         | R2          | 0.08  | 0.17  | 1.000 | -0.42 | 0.58  |
|                           | R3              |                   | 0.03        | 0.17  | 1.000 | -0.49 | 0.54  |       |
|                           | R4              |                   | 0.33        | 0.20  | 1.000 | -0.26 | 0.92  |       |
|                           | <b>R2</b>       | R3                | -0.05       | 0.08  | 1.000 | -0.30 | 0.19  |       |
|                           |                 | R4                | 0.25        | 0.16  | 1.000 | -0.22 | 0.72  |       |
| <b>R3</b>                 | R4              | 0.30              | 0.12        | 0.184 | -0.05 | 0.66  |       |       |
| <b>Recovery</b>           | <b>R1</b>       | R2                | 0.08        | 0.17  | 1.000 | -0.36 | 0.53  |       |
|                           |                 | R3                | 0.03        | 0.17  | 1.000 | -0.43 | 0.49  |       |
|                           |                 | R4                | 0.33        | 0.20  | 0.581 | -0.20 | 0.86  |       |
|                           | <b>R2</b>       | R3                | -0.05       | 0.08  | 1.000 | -0.28 | 0.17  |       |
|                           |                 | R4                | 0.25        | 0.16  | 0.683 | -0.17 | 0.67  |       |
|                           | <b>R3</b>       | R4                | 0.30        | 0.12  | 0.074 | -0.02 | 0.62  |       |
| <b>POMS Vigor Score</b>   | <b>All</b>      | <b>B2</b>         | Sleep Loss* | 4.13  | 0.41  | 0.000 | 2.88  | 5.37  |
|                           |                 |                   | R1*         | 1.21  | 0.33  | 0.007 | 0.20  | 2.22  |
|                           |                 |                   | R2*         | 1.40  | 0.37  | 0.004 | 0.28  | 2.52  |
|                           |                 |                   | R3*         | 1.70  | 0.35  | 0.000 | 0.64  | 2.76  |
|                           |                 |                   | R4*         | 2.23  | 0.40  | 0.000 | 1.02  | 3.43  |
|                           |                 | <b>Sleep Loss</b> | R1*         | -2.91 | 0.40  | 0.000 | -4.12 | -1.71 |
|                           |                 |                   | R2*         | -2.73 | 0.39  | 0.000 | -3.92 | -1.54 |
|                           |                 |                   | R3*         | -2.43 | 0.41  | 0.000 | -3.65 | -1.20 |
|                           |                 |                   | R4*         | -1.90 | 0.43  | 0.000 | -3.19 | -0.61 |
|                           |                 | <b>R1</b>         | R2          | 0.19  | 0.29  | 1.000 | -0.69 | 1.07  |
|                           | R3              |                   | 0.49        | 0.28  | 1.000 | -0.35 | 1.33  |       |
|                           | R4              |                   | 1.01        | 0.34  | 0.056 | -0.01 | 2.04  |       |
|                           | <b>R2</b>       | R3                | 0.30        | 0.22  | 1.000 | -0.37 | 0.97  |       |
|                           |                 | R4*               | 0.83        | 0.26  | 0.035 | 0.03  | 1.62  |       |
| <b>R3</b>                 | R4              | 0.53              | 0.21        | 0.197 | -0.10 | 1.15  |       |       |
| <b>Recovery</b>           | <b>R1</b>       | R2                | 0.19        | 0.29  | 1.000 | -0.60 | 0.97  |       |
|                           |                 | R3                | 0.49        | 0.28  | 0.497 | -0.26 | 1.24  |       |
|                           |                 | R4*               | 1.01        | 0.34  | 0.022 | 0.10  | 1.93  |       |
|                           | <b>R2</b>       | R3                | 0.30        | 0.22  | 1.000 | -0.30 | 0.90  |       |
|                           |                 | R4*               | 0.83        | 0.26  | 0.014 | 0.12  | 1.54  |       |
| <b>R3</b>                 | R4              | 0.53              | 0.21        | 0.079 | -0.04 | 1.09  |       |       |
| <b>MWT Sleep Latency</b>  | <b>Recovery</b> | <b>R1</b>         | R3          | -1.62 | 0.91  | 0.239 | -3.84 | 0.61  |
|                           |                 |                   | R4          | -1.56 | 1.08  | 0.456 | -4.20 | 1.08  |
|                           |                 | <b>R3</b>         | R4          | 0.06  | 0.62  | 1.000 | -1.46 | 1.57  |

SE=standard error; CI=confidence interval; B2=baseline day; R1-R4=recovery days; PVT=Psychomotor Vigilance Test; 1/RT=Response Speed; DSST=Digit Symbol Substitution Task; KSS=Karolinska Sleepiness Scale; POMS=Profile of Mood States; MWT=Maintenance of Wakefulness Test. \* $p < 0.05$ . Results are only presented for measures that did not demonstrate a significant interaction in between-group RMANOVAs using all time points and/or recovery only (between-group RMANOVA results are presented in Table 2).

**Table S2.** Bonferroni-adjusted pairwise comparison results, presented by condition, for variables that demonstrated a significant time by condition interaction.

| Measure                    | Condition  | Study Day         | Study Day   | Mean Difference | SE    | <i>p</i> | CI-Lower bound | CI-Upper bound |
|----------------------------|------------|-------------------|-------------|-----------------|-------|----------|----------------|----------------|
| <b>10 min PVT 1/RT</b>     | <b>SR</b>  | <b>B2</b>         | Sleep Loss* | 0.67            | 0.07  | 0.000    | 0.46           | 0.88           |
|                            |            |                   | R1*         | 0.31            | 0.05  | 0.000    | 0.15           | 0.46           |
|                            |            |                   | R2*         | 0.32            | 0.06  | 0.000    | 0.14           | 0.49           |
|                            |            |                   | R3*         | 0.35            | 0.05  | 0.000    | 0.19           | 0.51           |
|                            |            |                   | R4*         | 0.37            | 0.06  | 0.000    | 0.19           | 0.55           |
|                            |            | <b>Sleep Loss</b> | R1*         | -0.36           | 0.04  | 0.000    | -0.50          | -0.23          |
|                            |            |                   | R2*         | -0.35           | 0.05  | 0.000    | -0.50          | -0.20          |
|                            |            |                   | R3*         | -0.32           | 0.04  | 0.000    | -0.46          | -0.18          |
|                            |            |                   | R4*         | -0.30           | 0.05  | 0.000    | -0.45          | -0.15          |
|                            |            | <b>R1</b>         | R2          | 0.01            | 0.03  | 1.000    | -0.08          | 0.10           |
|                            |            |                   | R3          | 0.04            | 0.03  | 1.000    | -0.06          | 0.14           |
|                            |            |                   | R4          | 0.06            | 0.04  | 1.000    | -0.07          | 0.19           |
|                            | <b>R2</b>  | R3                | 0.03        | 0.03            | 1.000 | -0.06    | 0.12           |                |
|                            |            | R4                | 0.05        | 0.03            | 1.000 | -0.05    | 0.15           |                |
|                            | <b>R3</b>  | R4                | 0.02        | 0.02            | 1.000 | -0.04    | 0.08           |                |
|                            | <b>TSD</b> | <b>B2</b>         | Sleep Loss* | 0.64            | 0.07  | 0.000    | 0.43           | 0.84           |
|                            |            |                   | R1          | 0.02            | 0.02  | 1.000    | -0.05          | 0.09           |
|                            |            |                   | R2          | 0.03            | 0.03  | 1.000    | -0.06          | 0.12           |
|                            |            |                   | R3          | 0.02            | 0.03  | 1.000    | -0.08          | 0.12           |
|                            |            |                   | R4          | 0.08            | 0.04  | 0.610    | -0.04          | 0.20           |
|                            |            | <b>Sleep Loss</b> | R1*         | -0.61           | 0.06  | 0.000    | -0.80          | -0.42          |
|                            |            |                   | R2*         | -0.61           | 0.06  | 0.000    | -0.78          | -0.43          |
|                            |            |                   | R3*         | -0.62           | 0.06  | 0.000    | -0.80          | -0.44          |
|                            |            |                   | R4*         | -0.55           | 0.06  | 0.000    | -0.74          | -0.37          |
| <b>R1</b>                  |            | R2                | 0.01        | 0.02            | 1.000 | -0.07    | 0.08           |                |
|                            |            | R3                | -0.01       | 0.03            | 1.000 | -0.09    | 0.08           |                |
|                            |            | R4                | 0.06        | 0.03            | 1.000 | -0.05    | 0.16           |                |
| <b>R2</b>                  | R3         | -0.01             | 0.02        | 1.000           | -0.06 | 0.04     |                |                |
|                            | R4         | 0.05              | 0.02        | 0.390           | -0.02 | 0.12     |                |                |
| <b>R3</b>                  | R4*        | 0.07              | 0.02        | 0.013           | 0.01  | 0.12     |                |                |
| <b>DSST Number Correct</b> | <b>SR</b>  | <b>B2</b>         | Sleep Loss  | 1.73            | 1.15  | 1.000    | -1.85          | 5.31           |
|                            |            |                   | R1*         | -2.91           | 0.90  | 0.039    | -5.73          | -0.08          |
|                            |            |                   | R2*         | -4.20           | 0.82  | 0.000    | -6.76          | -1.65          |
|                            |            |                   | R3*         | -4.33           | 0.92  | 0.000    | -7.19          | -1.46          |
|                            |            |                   | R4*         | -4.34           | 0.85  | 0.000    | -6.99          | -1.68          |
|                            |            | <b>Sleep Loss</b> | R1*         | -4.63           | 0.73  | 0.000    | -6.91          | -2.36          |
|                            |            |                   | R2*         | -5.93           | 0.86  | 0.000    | -8.62          | -3.25          |
|                            |            |                   | R3*         | -6.06           | 0.97  | 0.000    | -9.09          | -3.02          |
|                            |            |                   | R4*         | -6.07           | 1.12  | 0.000    | -9.55          | -2.58          |
|                            |            | <b>R1</b>         | R2          | -1.30           | 0.55  | 0.328    | -3.00          | 0.40           |

|                   |            |                   |             |        |       |       |        |       |
|-------------------|------------|-------------------|-------------|--------|-------|-------|--------|-------|
|                   |            |                   | R3          | -1.42  | 0.62  | 0.400 | -3.35  | 0.51  |
|                   |            |                   | R4          | -1.43  | 0.67  | 0.586 | -3.53  | 0.66  |
|                   |            | <b>R2</b>         | R3          | -0.12  | 0.40  | 1.000 | -1.36  | 1.12  |
|                   |            |                   | R4          | -0.14  | 0.51  | 1.000 | -1.73  | 1.46  |
|                   |            | <b>R3</b>         | R4          | -0.01  | 0.59  | 1.000 | -1.84  | 1.81  |
|                   | <b>TSD</b> | <b>B2</b>         | Sleep Loss* | 6.25   | 1.10  | 0.000 | 2.84   | 9.66  |
|                   |            |                   | R1*         | -2.14  | 0.56  | 0.006 | -3.87  | -0.41 |
|                   |            |                   | R2*         | -3.50  | 0.66  | 0.000 | -5.55  | -1.46 |
|                   |            |                   | R3*         | -4.03  | 0.68  | 0.000 | -6.14  | -1.93 |
|                   |            |                   | R4*         | -4.45  | 0.81  | 0.000 | -6.96  | -1.94 |
|                   |            | <b>Sleep Loss</b> | R1*         | -8.39  | 0.88  | 0.000 | -11.12 | -5.66 |
|                   |            |                   | R2*         | -9.75  | 0.88  | 0.000 | -12.48 | -7.02 |
|                   |            |                   | R3*         | -10.28 | 0.94  | 0.000 | -13.21 | -7.35 |
|                   |            |                   | R4*         | -10.70 | 0.96  | 0.000 | -13.68 | -7.72 |
| <b>R1</b>         |            | R2*               | -1.36       | 0.35   | 0.006 | -2.46 | -0.27  |       |
|                   |            | R3*               | -1.89       | 0.49   | 0.006 | -3.43 | -0.36  |       |
|                   | R4*        | -2.31             | 0.58        | 0.004  | -4.13 | -0.50 |        |       |
| <b>R2</b>         | R3         | -0.53             | 0.37        | 1.000  | -1.68 | 0.62  |        |       |
|                   | R4         | -0.95             | 0.38        | 0.256  | -2.14 | 0.24  |        |       |
| <b>R3</b>         | R4         | -0.42             | 0.48        | 1.000  | -1.92 | 1.08  |        |       |
| <b>KSS Score</b>  | <b>SR</b>  | <b>B2</b>         | Sleep Loss* | -2.56  | 0.33  | 0.000 | -3.60  | -1.52 |
|                   |            |                   | R1          | -0.25  | 0.18  | 1.000 | -0.80  | 0.31  |
|                   |            |                   | R2          | -0.33  | 0.15  | 0.575 | -0.81  | 0.15  |
|                   |            |                   | R3          | -0.29  | 0.16  | 1.000 | -0.78  | 0.21  |
|                   |            |                   | R4          | -0.20  | 0.18  | 1.000 | -0.75  | 0.35  |
|                   |            | <b>Sleep Loss</b> | R1*         | 2.31   | 0.31  | 0.000 | 1.36   | 3.26  |
|                   |            |                   | R2*         | 2.23   | 0.28  | 0.000 | 1.36   | 3.11  |
|                   |            |                   | R3*         | 2.28   | 0.30  | 0.000 | 1.33   | 3.22  |
|                   |            |                   | R4*         | 2.36   | 0.30  | 0.000 | 1.43   | 3.29  |
|                   |            | <b>R1</b>         | R2          | -0.08  | 0.20  | 1.000 | -0.71  | 0.55  |
|                   |            |                   | R3          | -0.04  | 0.20  | 1.000 | -0.64  | 0.57  |
|                   | R4         |                   | 0.05        | 0.21   | 1.000 | -0.61 | 0.71   |       |
|                   | <b>R2</b>  | R3                | 0.04        | 0.12   | 1.000 | -0.32 | 0.41   |       |
|                   |            | R4                | 0.13        | 0.15   | 1.000 | -0.34 | 0.60   |       |
|                   | <b>R3</b>  | R4                | 0.08        | 0.11   | 1.000 | -0.24 | 0.41   |       |
|                   | <b>TSD</b> | <b>B2</b>         | Sleep Loss* | -3.81  | 0.32  | 0.000 | -4.81  | -2.81 |
|                   |            |                   | R1          | -0.24  | 0.11  | 0.558 | -0.59  | 0.11  |
|                   |            |                   | R2          | -0.25  | 0.15  | 1.000 | -0.71  | 0.22  |
| R3                |            |                   | -0.36       | 0.16   | 0.406 | -0.84 | 0.13   |       |
| R4                |            |                   | -0.14       | 0.13   | 1.000 | -0.56 | 0.27   |       |
| <b>Sleep Loss</b> |            | R1*               | 3.57        | 0.32   | 0.000 | 2.57  | 4.56   |       |
|                   |            | R2*               | 3.56        | 0.29   | 0.000 | 2.65  | 4.48   |       |
|                   |            | R3*               | 3.45        | 0.30   | 0.000 | 2.51  | 4.39   |       |
|                   |            | R4*               | 3.67        | 0.30   | 0.000 | 2.73  | 4.60   |       |
| <b>R1</b>         | R2         | -0.01             | 0.13        | 1.000  | -0.41 | 0.40  |        |       |
|                   | R3         | -0.12             | 0.16        | 1.000  | -0.62 | 0.39  |        |       |

|                          |            |                   |             |        |       |        |        |        |
|--------------------------|------------|-------------------|-------------|--------|-------|--------|--------|--------|
|                          |            |                   | R4          | -0.10  | 0.14  | 1.000  | -0.32  | 0.52   |
|                          |            | <b>R2</b>         | R3          | -0.11  | 0.09  | 1.000  | -0.39  | 0.17   |
|                          |            |                   | R4          | -0.10  | 0.10  | 1.000  | -0.20  | 0.40   |
|                          |            | <b>R3</b>         | R4          | 0.21   | 0.10  | 0.547  | -0.10  | 0.52   |
| <b>MWT Sleep Latency</b> | <b>SR</b>  | <b>B2</b>         | Sleep Loss* | 9.87   | 1.48  | 0.000  | 5.49   | 14.26  |
|                          |            |                   | R1          | 2.72   | 1.66  | 1.000  | -2.22  | 7.66   |
|                          |            |                   | R3          | 0.69   | 0.98  | 1.000  | -2.23  | 3.61   |
|                          |            |                   | R4          | 0.70   | 1.32  | 1.000  | -3.21  | 4.62   |
|                          |            | <b>Sleep Loss</b> | R1*         | -7.15  | 1.56  | 0.000  | -11.77 | -2.53  |
|                          |            |                   | R3*         | -9.18  | 1.35  | 0.000  | -13.20 | -5.16  |
|                          |            |                   | R4*         | -9.17  | 1.56  | 0.000  | -13.79 | -4.55  |
|                          |            | <b>R1</b>         | R3          | -2.03  | 1.56  | 1.000  | -6.66  | 2.60   |
|                          | R4         |                   | -2.02       | 1.82   | 1.000 | -7.42  | 3.38   |        |
|                          | <b>R3</b>  | R4                | 0.01        | 1.10   | 1.000 | -3.26  | 3.29   |        |
|                          | <b>TSD</b> | <b>B2</b>         | Sleep Loss* | 14.22  | 1.45  | 0.000  | 9.92   | 18.52  |
|                          |            |                   | R1          | 0.12   | 1.04  | 1.000  | -2.96  | 3.20   |
|                          |            |                   | R3          | -1.08  | 0.83  | 1.000  | -3.54  | 1.38   |
|                          |            |                   | R4          | -0.98  | 1.04  | 1.000  | -4.06  | 2.10   |
|                          |            | <b>Sleep Loss</b> | R1*         | -14.10 | 1.41  | 0.000  | -18.29 | -9.91  |
|                          |            |                   | R3*         | -15.30 | 1.47  | 0.000  | -19.65 | -10.94 |
| R4*                      |            |                   | -15.20      | 1.54   | 0.000 | -19.76 | -10.63 |        |
| <b>R1</b>                |            | R3                | -1.20       | 0.96   | 1.000 | -4.04  | 1.64   |        |
|                          | R4         | -1.10             | 1.18        | 1.000  | -4.60 | 2.40   |        |        |
| <b>R3</b>                | R4         | 0.10              | 0.59        | 1.000  | -1.64 | 1.85   |        |        |

SE=standard error; CI=confidence interval; SR=sleep restriction; TSD=total sleep deprivation; B2=baseline day; R1-R4=recovery days; PVT=Psychomotor Vigilance Test; 1/RT=Response Speed; DSST=Digit Symbol Substitution Task; KSS=Karolinska Sleepiness Scale; MWT=Maintenance of Wakefulness Test. \* $p < 0.05$ .
